# Supplementary material
Source: MDPI journal article supplement (https://www.mdpi.com/2297-8739/10/6/342)
Supplement: s1 [file s1]

# Experimental Design Approach for Development of HPLC Method for Simultaneous Analysis of Triamcinolone, Nystatin, and Gramicidin in Industrial Wastewater

Loubna Elsharkawy <sup>1</sup>, Maha A. Hegazy <sup>2</sup>, Ahmed E. Elgendy <sup>3</sup> and Rasha M. Ahmed <sup>3,\*</sup>

<sup>1</sup> Applied Biotechnology Department, Biotechnology School, Nile University, 26th of July Corridor, Sheikh Zayed City 3247010, Giza, Egypt; lelsharkawy@nu.edu.eg

<sup>2</sup> Analytical Chemistry Department, Faculty of Pharmacy, Cairo University, Kasr Al-Aini Street, Cairo 11562, Egypt; maha.hegazy@pharma.cu.edu.eg

<sup>3</sup> Pharmaceutical Chemistry Department, Faculty of Pharmacy, Misr International University, KM 28 Ismailia Road, Cairo 44971, Egypt; ahmed.emad@miuegypt.edu.eg

\* Correspondence: rasha\_ahmed@miuegypt.edu.eg; Tel.: +202-01223682995

---

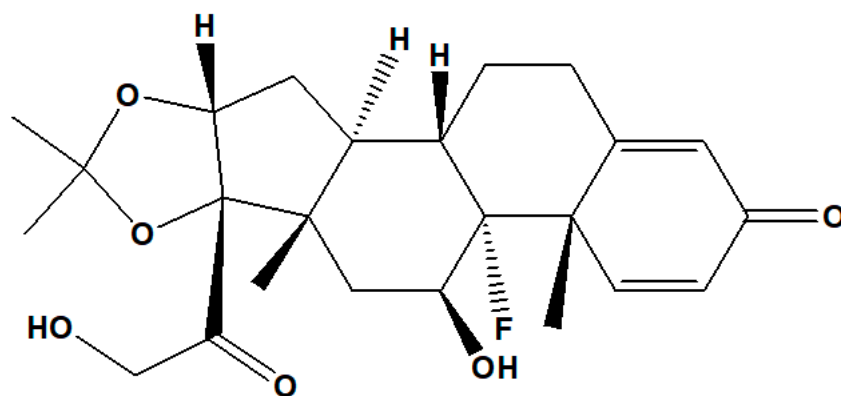

(a)

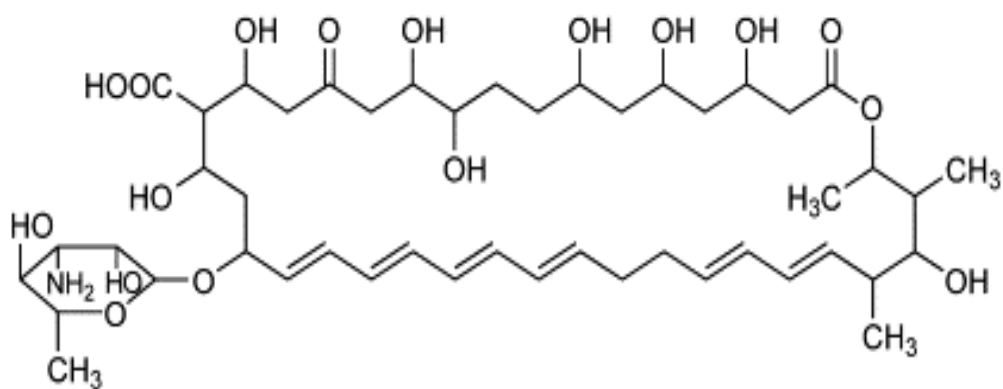

(b)

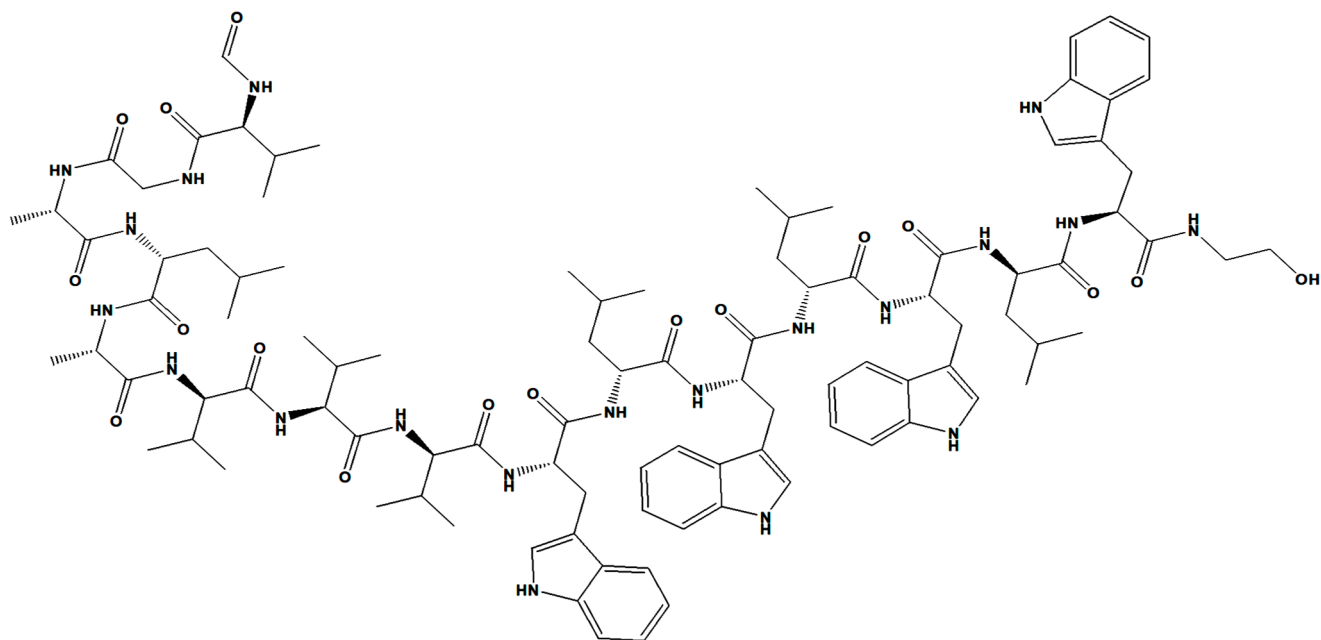

(c)

**Figure S1:** Chemical structures of triamcinolone (a), nystatin (b), and gramicidin (c)

---

**Table S1.** Coded and uncoded factors for the screening design for the purposed HPLC method

| Coded | Uncoded |                   |                       |
|-------|---------|-------------------|-----------------------|
|       | pH      | Organic Solvent % | Flow rate<br>(mL/min) |
| -1    | 2.50    | 85.00             | 1.00                  |
| 0     | 3.00    | 87.00             | 1.20                  |
| +1    | 3.50    | 89.00             | 1.40                  |

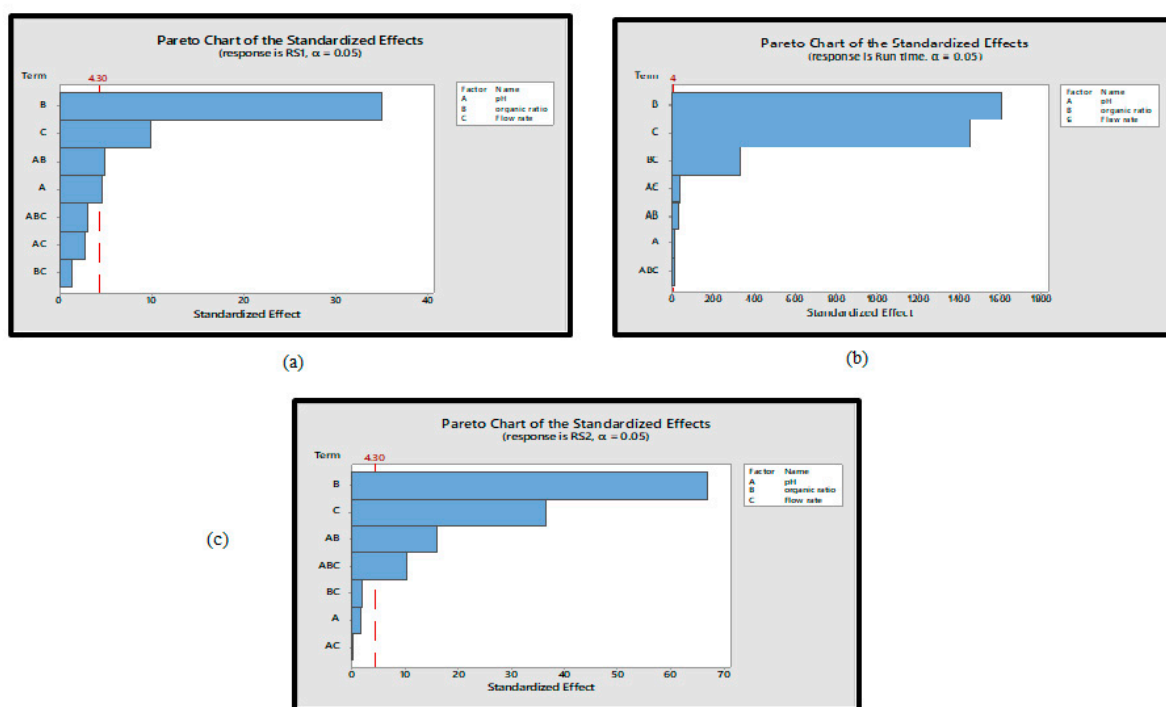

**Figure S2.** Pareto charts of the parameters and their effects on the response.

**a:** Effect of pH, organic ratio and flow rate on  $R_{s1}$ .

**b:** Effect of pH, organic ratio and flow rate on run time.

**c:** Effect of pH, organic ratio and flow rate on  $R_{s2}$ .

**Table S2.** Coded and uncoded factors for optimization design: Central Composite design for proposed HPLC method.

| Coded | Uncoded |                   |                    |
|-------|---------|-------------------|--------------------|
|       | pH      | Organic Solvent % | Flow rate (mL/min) |
| -1.68 | 2.2     | 83.6              | 0.9                |
| -1    | 2.5     | 85.0              | 1.0                |
| 0     | 3.0     | 87.0              | 1.2                |
| +1    | 3.5     | 89.0              | 1.4                |
| +1.68 | 3.8     | 90.4              | 1.5                |

---

**Table S3.** A summary list ANOVA results in optimization design.

|                  | P value of<br>Model | R squared | R adjusted |
|------------------|---------------------|-----------|------------|
| R <sub>s</sub> 1 | 0.02                | 0.93      | 0.81       |
| R <sub>s</sub> 2 | 0.05                | 0.71      | 0.68       |
| Run time         | 0.00                | 0.98      | 0.96       |

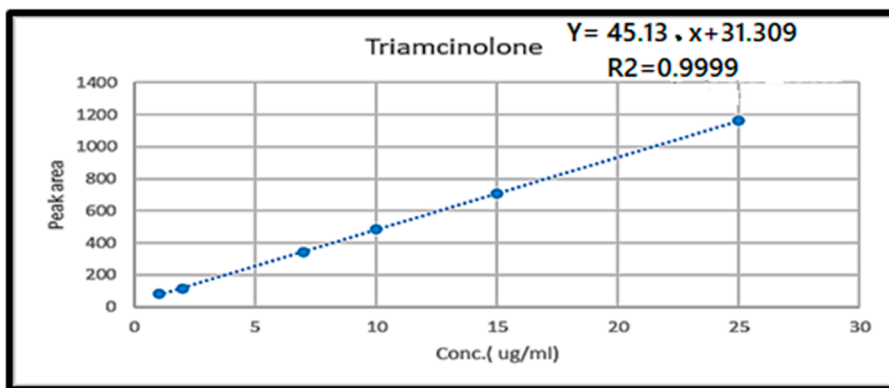

**Figure S3.** Calibration curve for triamcinolone (1.00-25.00 ug/mL).

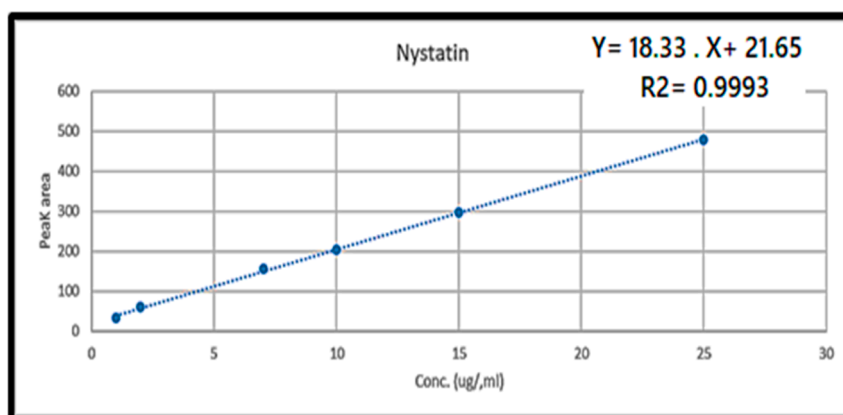

**Figure S4.** Calibration curve for nystatin (1.00-25.00 ug/mL).

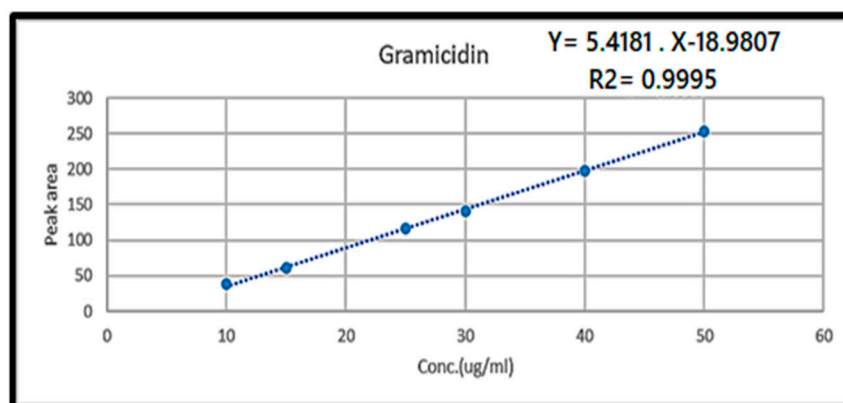

**Figure S5.** Calibration curve for gramicidin (10.00-50.00 ug/mL).

**Table S4:** Accuracy assessment of the proposed HPLC method for triamcinolone, nystatin and, gramicidin.

| Triamcinolone                  |                            |                   | Nystatin                |                 |                  | Gramicidin              |                 |                 |
|--------------------------------|----------------------------|-------------------|-------------------------|-----------------|------------------|-------------------------|-----------------|-----------------|
| Amount taken<br>(µg/ml)        | Amount<br>found<br>(µg/ml) | Recovery*<br>%±SD | Amount taken<br>(µg/ml) | Amount<br>found | Recovery %       | Amount taken<br>(µg/ml) | Amount<br>found | Recovery %      |
| 5.00                           | 4.99                       | 99.80<br>±0.01    | 5.00                    | 4.95            | 99.08<br>± 0.12  | 20.00                   | 19.94           | 99.70<br>±0.15  |
| 12.00                          | 11.78                      | 98.17 ±0.06       | 12.00                   | 12.24           | 102.0<br>± 0.17  | 35.00                   | 35.69           | 101.97<br>±0.22 |
| 22.00                          | 21.83                      | 99.23 ±0.06       | 22.00                   | 22.43           | 101.95<br>± 0.06 | 45.00                   | 44.95           | 99.89<br>±0.04  |
| <b>Mean<br/>Recovery % ±SD</b> |                            | 99.07 ±0.04       | 101.01<br>±0.12         |                 |                  | 100.52<br>±0.14         |                 |                 |

\* Average of three determinations.

**Table S5.** Interday and intraday results for triamcinolone, nystatin and, gramicidin by the proposed HPLC method.

| Triamcinolone           |                          |             | Nystatin                |                         |           | Gramicidin              |                         |           |
|-------------------------|--------------------------|-------------|-------------------------|-------------------------|-----------|-------------------------|-------------------------|-----------|
| Intraday precision      |                          |             |                         |                         |           |                         |                         |           |
| Amount taken<br>(µg/mL) | Amount found*<br>(µg/mL) | % RSD*<br>* | Amount taken<br>(µg/mL) | Amount found<br>(µg/mL) | % RS<br>D | Amount taken<br>(µg/mL) | Amount found<br>(µg/mL) | % RS<br>D |
| 5.00                    | 4.994                    | 0.15        | 5.00                    | 5.10                    | 1.26      | 20.00                   | 20.10                   | 0.50      |
| 12.00                   | 11.766                   | 0.49        | 12.00                   | 12.30                   | 1.41      | 35.00                   | 34.90                   | 0.62      |
| 22.00                   | 21.77                    | 0.28        | 22.00                   | 22.20                   | 0.26      | 45.00                   | 45.23                   | 0.09      |
| Inter-day precision     |                          |             |                         |                         |           |                         |                         |           |
| Amount taken<br>(µg/mL) | Amount found<br>(µg/ml)  | % RSD       | Amount taken<br>(µg/mL) | Amount found<br>(µg/ml) | % RS<br>D | Amount taken<br>(µg/mL) | Amount found<br>(µg/mL) | % RS<br>D |
| 5.00                    | 4.99                     | 0.48        | 5.00                    | 5.10                    | 1.13      | 20.00                   | 20.02                   | 0.79      |
| 12.00                   | 11.8                     | 0.26        | 12.00                   | 12.03                   | 0.29      | 35.00                   | 34.92                   | 0.22      |
| 22.00                   | 21.6                     | 0.97        | 22.00                   | 22.13                   | 0.69      | 45.00                   | 45.01                   | 0.37      |

\* Average of three determinations.

\*\*%RSD: relative standard deviation percentage



**Table S6.** System Suitability parameters of the proposed HPLC method for determination of triamcinolone, nystatin, and gramicidin.

| Parameters                                    | Triamcinolone | Nystatin | Gramicidin | Reference value [22] |
|-----------------------------------------------|---------------|----------|------------|----------------------|
| <b>Resolution (<math>R_s</math>)</b>          | 9.00          | 9.80     |            | >1.5                 |
| <b>Retention time (<math>R_t</math>; min)</b> | 2.90          | 3.70     | 5.60       | -----                |
| <b>Selectivity (<math>\alpha</math>)</b>      | 2.91          | 1.77     |            | $\alpha \geq 1$      |
| <b>Theoretical Plates (N)</b>                 | 3045          | 3539     | 3146       | >2000                |
| <b>Tailing factor (T)</b>                     | 1.32          | 1.20     | 1.43       | $\leq 2$             |
| <b>Capacity factor (k)</b>                    | 1.40          | 2.08     | 3.67       | 1-10                 |

**Table S7.** Robustness design for the proposed HPLC method.

| pH of phosphate buffer | Organic Solvent % | Flow rate (mL/min) | $R_s1$    | $R_s2$     | Run time  |
|------------------------|-------------------|--------------------|-----------|------------|-----------|
| -1                     | 1                 | -1                 | 4.57±0.02 | 9.85±0.02  | 5.80±0.10 |
| 0                      | 0                 | 0                  | 4.50±0.20 | 11.10±0.10 | 5.70±0.02 |
| 1                      | -1                | 1                  | 4.20±0.30 | 12.80±0.25 | 5.60±0.02 |
| -1                     | 1                 | 1                  | 4.43±0.15 | 9.06±0.02  | 5.20±0.06 |
| 0                      | 0                 | 0                  | 4.59±0.02 | 11.57±0.09 | 5.70±0.03 |
| 0                      | 0                 | 0                  | 4.46±0.15 | 10.70±0.06 | 5.70±0.10 |
| 1                      | -1                | -1                 | 4.50±0.01 | 12.37±0.01 | 6.40±0.06 |
| 1                      | 1                 | 1                  | 4.50±0.02 | 9.20±0.15  | 4.90±0.01 |
| -1                     | -1                | -1                 | 4.67±0.07 | 11.10±0.11 | 6.50±0.01 |
| -1                     | -1                | 1                  | 4.70±0.06 | 10.30±0.10 | 5.90±0.02 |
| 1                      | 1                 | -1                 | 4.47±0.02 | 10.20±0.06 | 5.50±0.01 |

---

**Table S8.** Coded and the uncoded factors for the robustness design for HPLC method.

| Coded | Uncoded |                   |                        |
|-------|---------|-------------------|------------------------|
|       | pH      | Organic Solvent % | Flow rate<br>( mL/min) |
| -1    | 3.5     | 86.7              | 1.2                    |
| 0     | 3.6     | 87.7              | 1.3                    |
| +1    | 3.7     | 88.7              | 1.4                    |
